# Supplementary material
Source: PubMed Central journal article supplement (PMC5655517)

**SUPPLEMENTAL DATA**

**Table S1. Primers used in this study.**

| Number | Sequence                                                                     | Restriction Enzyme     |
|--------|------------------------------------------------------------------------------|------------------------|
| A115   | GGTCAGACCAGTTCGGGGGTCAC                                                      |                        |
| A118   | GTGGTCATGGGGATGCGGACTTC                                                      |                        |
| A193   | TGGAAGTGGCCGATGCGT                                                           |                        |
| A194   | TCAAGTCACTGCCGGGGT                                                           |                        |
| A197   | ACGTCGGCACTACCCGTCT                                                          |                        |
| A198   | ACGCGCCCGATCACATAG                                                           |                        |
| A215   | GAAGGAATTACATATGGGCAACAATGTCCCG                                              | NdeI                   |
| A216   | GCTAGAGTACTTGTCTTCCTGAACCCCGC                                                | ScaI                   |
| A217   | TTTTTTTTTCCAAGAATGGATCTACGTCGTCACCGAAGC                                      | Van9II                 |
| A218   | TTTTTTTTTCCAACGCATGGGAACCCGACCAGTCTG                                         | Van9II                 |
| A219   | TTTTTTTTTCCATGCGTTGGGGAGTAACCATCGACCTGGC                                     | Van9II                 |
| A220   | TTTTTTTTTCCAACTTTTGCGGAGCTGACACCGGAGAC                                       | Van9II                 |
| A470   | AAAGGTACCAAGTCCTCCCGGCTCGT                                                   | KpnI                   |
| A472   | TTTTTCTAGAGCTTAGCCCGCGTAGTCCGGGACGTCGTACGGGT<br>AAGCTCTTCCTGTCTTCCTGAACCCCGC | XbaI-BlpI-<br>HA-BspQI |
| A522   | CACCGTGACCGATTTCGGAGCAGCC                                                    |                        |
| A523   | TCATGTCTTCCTGAACCCCGCCAGGTC                                                  |                        |

Restriction enzyme sites are underlined.

**Table S2. Colony size of suppressor mutants, S4 and S21, after transformation of LmeA-HA expression vector.**

| Strain     | Colony Size (mm) |
|------------|------------------|
| WT         | 3.17 ± 0.69      |
| S4 + LmeA  | 2.79 ± 0.64      |
| S21 + LmeA | 3.84 ± 0.96      |

The data shown are average ± standard deviation. N = 10.

## Supplemental Figure Legends

**Figure S1.** Profiles of PIMs purified from suppressor mutants analyzed by TLC and visualized by orcinol staining. None of the suppressor mutants show AcPIM6 production. Only a part of TLC plates is shown.

**Figure S2.** Characterization of LM and LAM in the suppressor mutants. LM/LAM were separated by SDS-PAGE and visualized by ProQ Emerald glycan staining. Black arrows indicate the accumulation of smaller LM or LAM.

**Figure S3.** Markerless deletion of *lmeA*. A) The genomic region covering the upstream and downstream of *lmeA*. Upper panel, WT; lower panel,  $\Delta lmeA$ . Arrows and boxes A217, A218, A219, and A220 indicates the primers used to create the knockout construct, pMUM57. Grey arrows and boxes, forward primers; green arrows and boxes, reverse primers. B) The confirmation of *lmeA* deletion by PCR using A217 and A220. Expected sizes were 3.29 kbp (open arrowhead) for WT or 2.50 kbp (filled arrowhead) for  $\Delta lmeA$  (DXO). In the single crossover (SXO) strain, both bands are expected.

**Figure S4.** Analysis of  $\Delta lmeA$ . A) Markerless deletion of *lmeA* does not impact other phospholipids. Crude lipid extracts of WT and  $\Delta lmeA$  were separated on TLC and stained with iodine. CL, cardiolipin. B) LmeA-HA carrying missense mutations found in the suppressor mutants S1 and S10 cannot rescue the  $\Delta lmeA$  phenotype.  $\Delta lmeA$  was transformed with an expression vector for LmeA G170D or V181G mutant. ProQ Emerald staining of LM/LAM separated by SDS-PAGE. C) Western blot showing that LmeA-HA carrying the G170D or V181G point mutation was not detected. Ponceau S staining shows protein loading in each lane.

**Figure S5.** LmeA is conserved in the *Corynebacteriales* order. A) A protein phylogeny of LmeA and its orthologs. Orthologs were identified throughout the *Corynebacteriales* order. A., *Amycolicoccus*; C., *Corynebacterium*; D., *Dietzia*; G., *Gordonia*; M., *Mycobacterium*; N., *Nocardia*; R., *Rhodococcus*; S., *Segniliparus*; T., *Tsukamurella*. The phylogenetic tree was created using Geneious 10.1 (Biomatters) with the following settings: cost matrix, identity; genetic distance model, Jukes-Cantor; method, neighbor joining. Branch length indicates amino acid substitutions per site. B) Homology alignment of *Msmeg* LmeA, MSMEG\_5785, and *Mtb* LmeA, Rv0817c, showing several highly conserved regions (shaded in black) and overall 60% identity. The missense mutations found in the suppressor mutants S1 and S10 are marked by \* and #, respectively.

**Figure S6.** Dose response of LmeA binding to various lipids. A) Cupric acetate staining of 0.7 nmol of PE and TAG developed with hexane / diethyl ether / formic acid (40:10:1). B-C) Cupric acetate staining of 0.7 nmol of PI and PE (panel B) or PE, PA, and GGP (panel C) developed with chloroform / methanol / 13 M ammonia / 1 M ammonium acetate / water (180:140:9:9:23). D-I) Dose response of His-LmeA to LM intermediates, PE, PI, PA, TAG, or GGP. T, lysate of *E. coli* cell transformed with the His-LmeA expression vector; UT, lysate of untransformed *E. coli*. Both lysates were prepared after 3 hour IPTG induction. Note that the concentration range of GGP is different from those of the other lipids.

**Figure S7.** Soluble mannose-containing molecules do not competitively inhibit the binding of LmeA to PE. No competitor (None), 10 mM mannose 1-phosphate (M1P), or 10 mM GDP-Man was pre-incubated with *E. coli* cell lysate expressing LmeA before addition of lysate to the microtiter plate coated with 1.25  $\mu$ M PE.

### Supplemental Figure 1

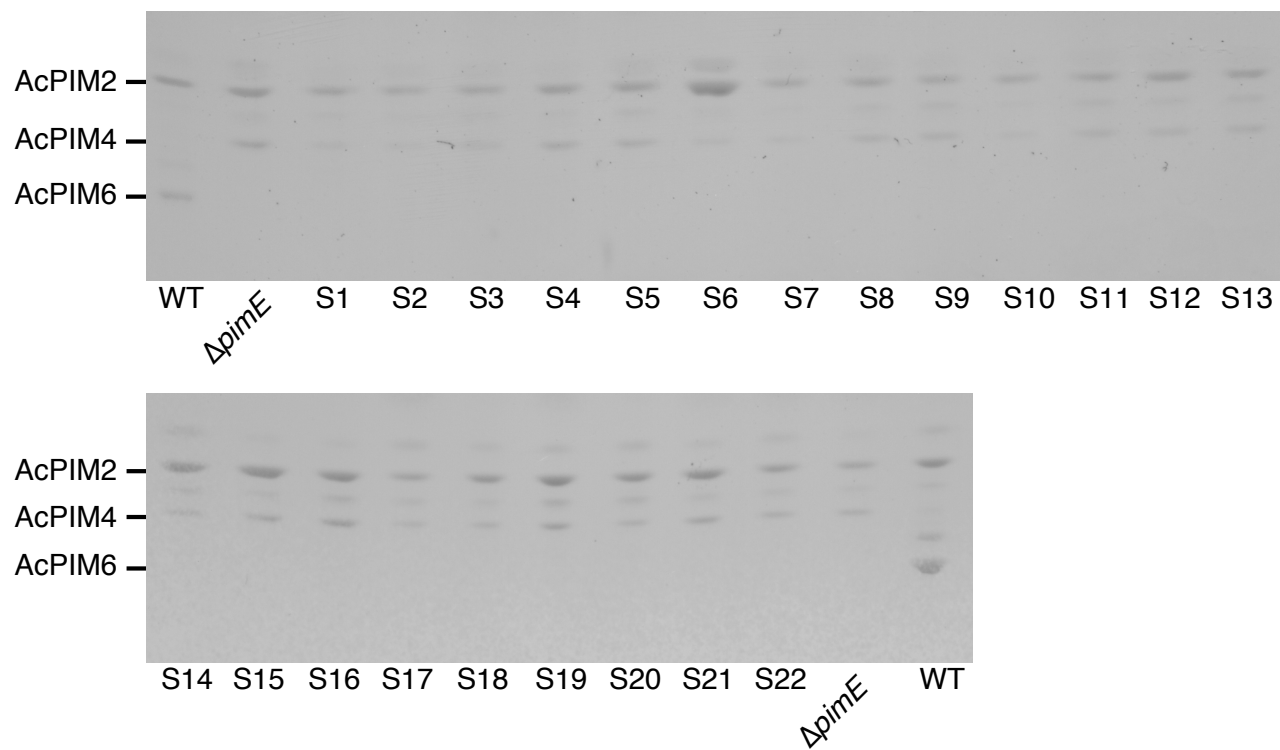

Supplemental Figure 2

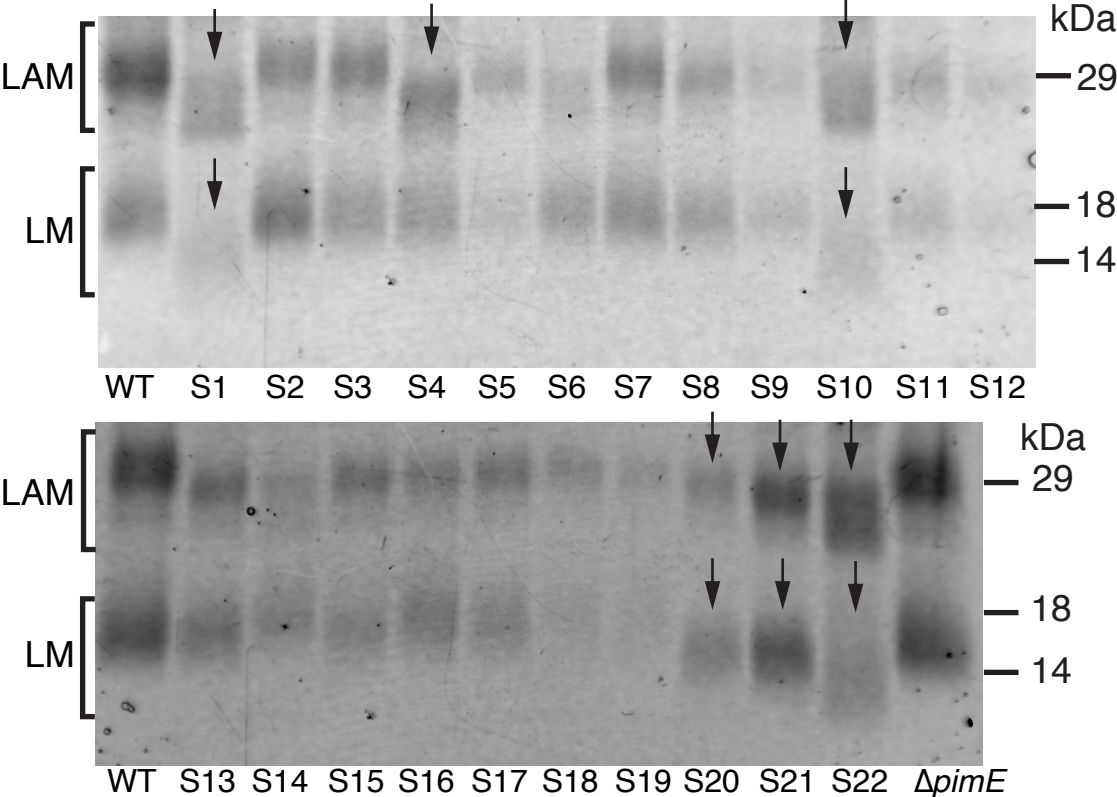

### Supplemental Figure 3

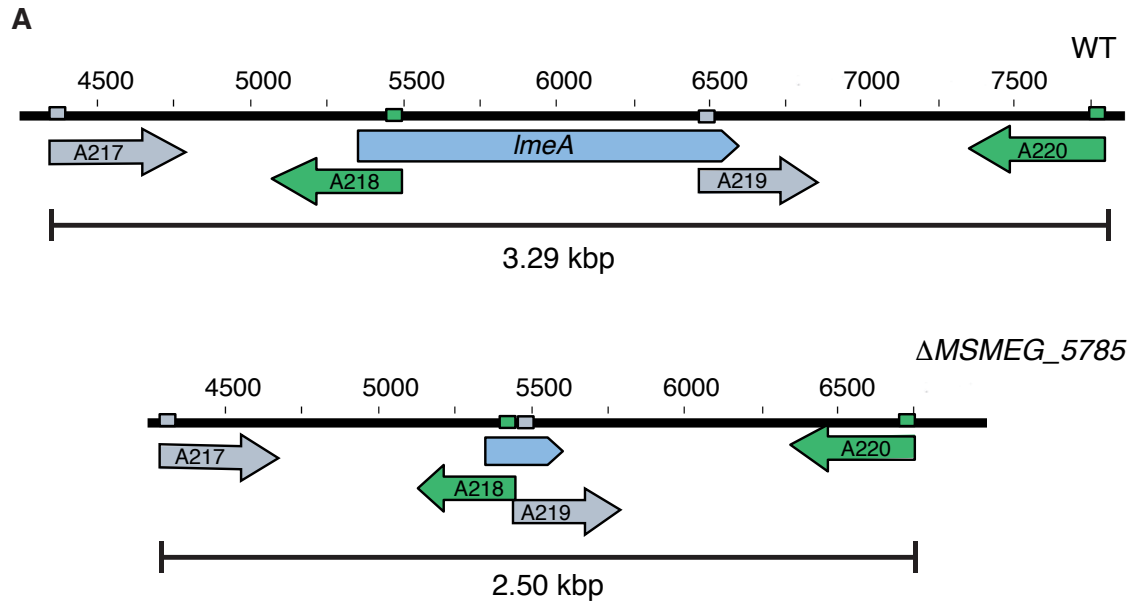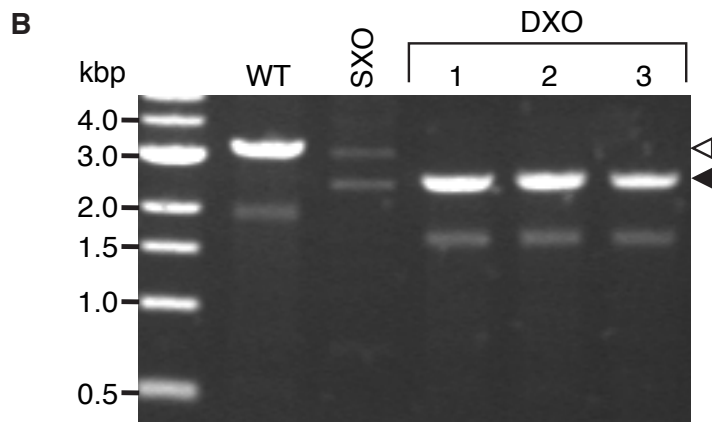

### Supplemental Figure 4

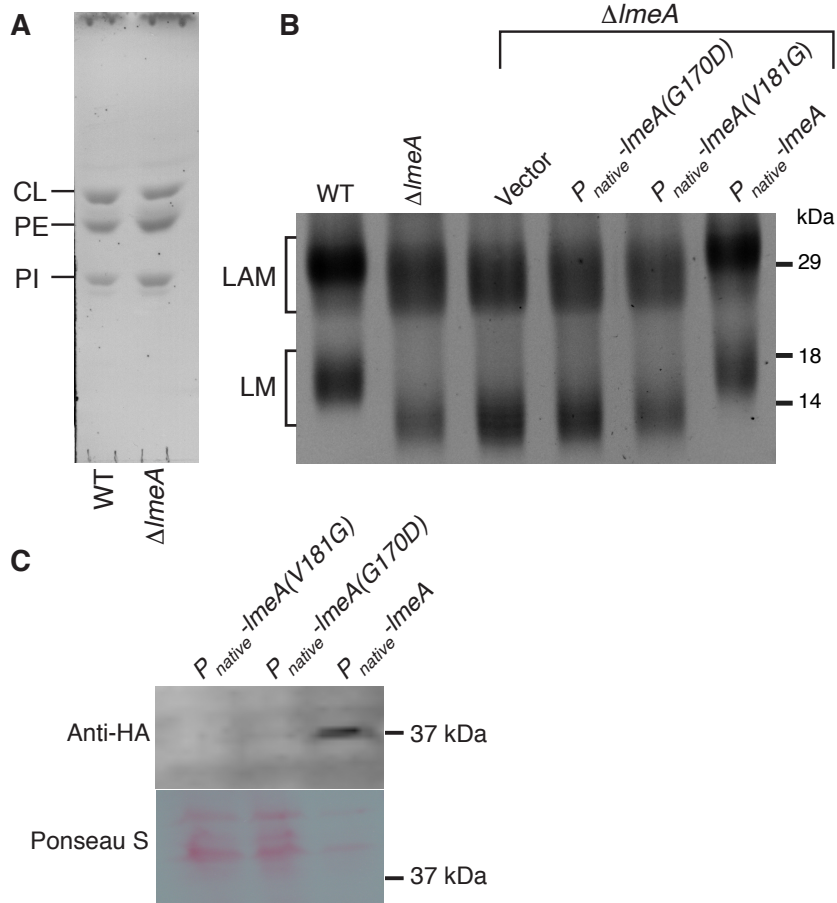

## Supplemental Figure 5

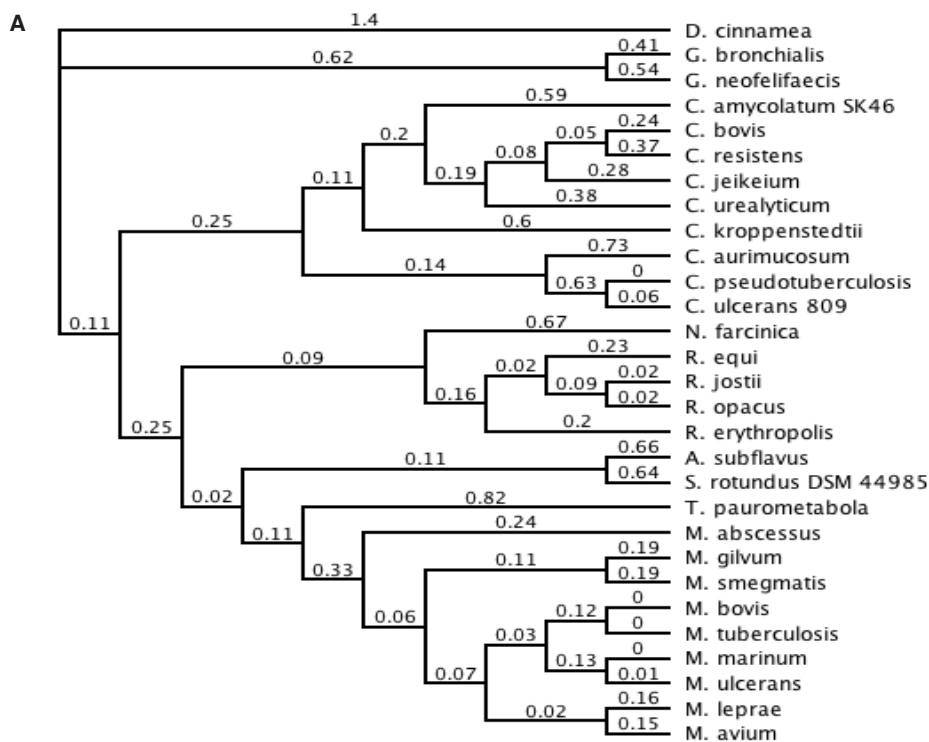

**B**

|                 |     |   |   |   |   |   |   |   |   |   |   |   |   |   |   |   |   |   |   |   |   |   |   |   |   |   |   |   |   |   |   |   |   |   |   |   |   |   |   |   |   |   |   |   |   |   |   |   |   |   |   |   |   |   |   |   |   |   |   |   |   |
|-----------------|-----|---|---|---|---|---|---|---|---|---|---|---|---|---|---|---|---|---|---|---|---|---|---|---|---|---|---|---|---|---|---|---|---|---|---|---|---|---|---|---|---|---|---|---|---|---|---|---|---|---|---|---|---|---|---|---|---|---|---|---|---|
| M. tuberculosis | 1   | M | P | M | R | K | V | L | V | G | T | G | A | A | I | V | V | A | L | I | V | G | A | V | G | A | - | D | F | G | A | S | I | Y | A | E | Y | R | L | S | T | V | R | K | A | A | N | L | R | S | D | F | F | V | A | I | L | R |   |   |   |
| M. smegmatis    | 1   | M | G | N | N | V | P | V | R | R | L | V | V | G | F | V | A | A | A | A | L | V | G | A | V | G | T | D | F | G | A | I | Y | A | E | Y | R | L | A | R | T | V | R | S | A | A | S | L | N | W | D | F | W | V | A | I | L | G |   |   |   |
| M. tuberculosis | 60  | F | P | F | I | P | Q | A | M | R | E | H | Y | A | E | L | E | I | R | A | F | A | V | E | H | A | G | S | G | T | A | L | E | A | T | M | H | S | I | D | L | S | Y | A | S | W | L | I | R | P | D | A | K | L | P | V | G | E | L | E |   |
| M. smegmatis    | 61  | F | P | F | I | P | Q | A | R | H | R | Y | N | E | I | E | I | R | A | N | G | V | D | H | P | V | A | E | K | V | S | L | E | A | T | L | H | D | V | D | I | E | A | S | W | L | I | R | E | D | A | P | L | P | V | A | E | A | E |   |   |
| M. tuberculosis | 120 | S | R | I | I | D | S | M | H | L | G | R | V | L | G | I | S | D | L | M | V | A | A | P | R | O | E | S | N | D | A | T | G | G | T | T | E | S | G | I | S | G | S | R | G | L | V | F | S | G | T | P | I | S | A | N | F | A | H | R |   |
| M. smegmatis    | 121 | S | R | I | I | D | S | T | H | V | G | R | Y | M | G | I | D | L | L | V | E | A | P | S | R | D | T | N | D | A | T | G | G | T | T | E | S | G | I | S | G | N | T | G | L | V | F | T | G | T | P | K | A | S | G | L | D | K | R |   |   |
|                 |     | # |   |   |   |   |   |   |   |   |   |   |   |   |   |   |   |   |   |   |   |   |   |   |   |   |   |   |   |   |   |   |   |   |   |   |   |   |   |   |   |   |   |   |   |   |   |   |   |   |   |   |   |   |   |   |   |   |   |   |   |
| M. tuberculosis | 180 | V | S | V | L | V | D | L | S | V | A | S | D | D | R | A | T | L | V | I | T | P | T | A | V | V | T | G | P | D | T | A | D | O | P | V | P | D | D | K | R | D | A | V | L | H | A | F | A | S | K | L | P | N | O | K | L | P | F | G | V |
| M. smegmatis    | 181 | V | S | V | A | V | D | L | S | L | E | G | P | D | Q | S | T | L | V | L | T | A | N | G | I | L | T | G | P | N | T | A | D | E | O | V | P | D | D | K | L | A | S | V | L | D | E | F | S | N | T | I | P | D | L | R | L | P | F | G | I |
| M. tuberculosis | 240 | V | P | N | T | V | G | A | R | G | S | D | V | I | I | E | G | I | G | E | C | V | T | I | S | L | D | E | F | K | O | S |   |   |   |   |   |   |   |   |   |   |   |   |   |   |   |   |   |   |   |   |   |   |   |   |   |   |   |   |   |
| M. smegmatis    | 241 | A | P | T | S | Q | G | A | R | G | S | D | I | I | I | E | G | I | G | E | C | V | T | I | D | L | A | G | F | R | K | T |   |   |   |   |   |   |   |   |   |   |   |   |   |   |   |   |   |   |   |   |   |   |   |   |   |   |   |   |   |

## Supplemental Figure 6

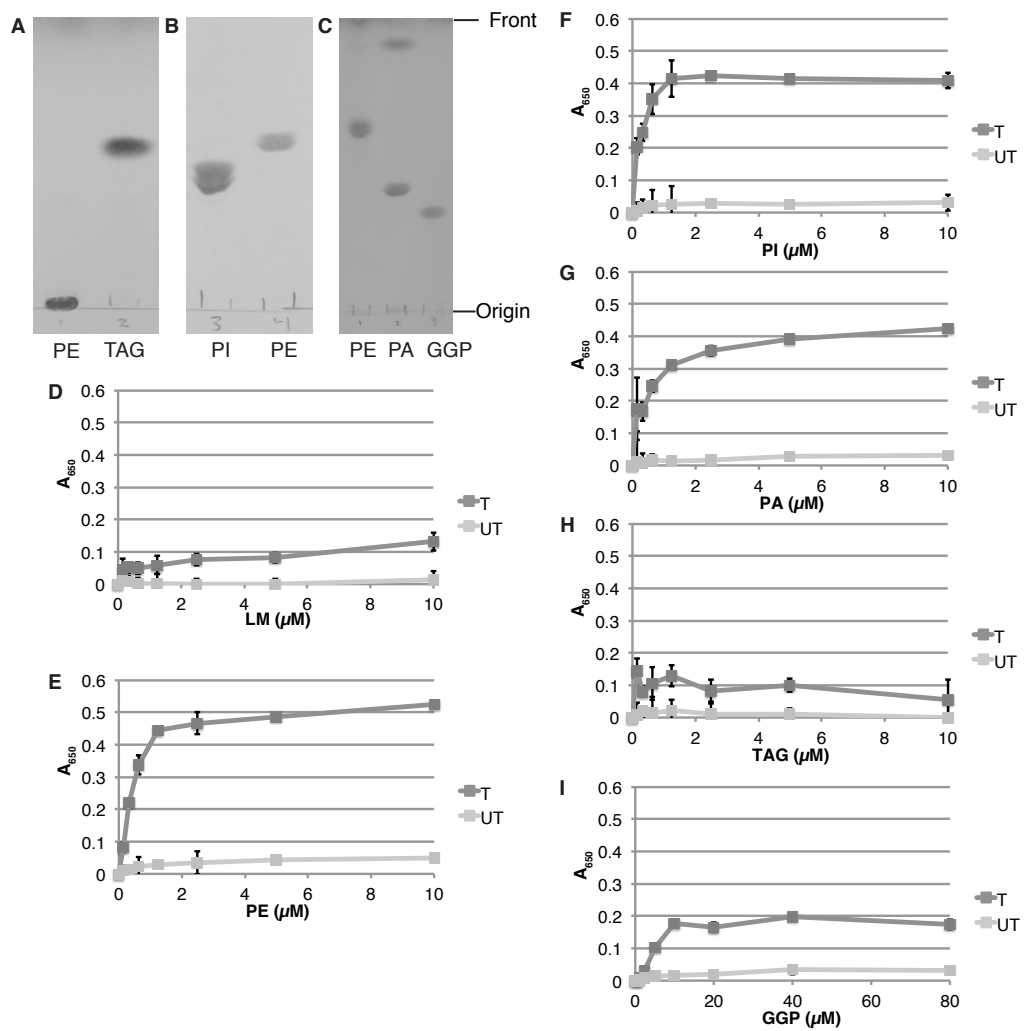



**Supplemental Figure 7**

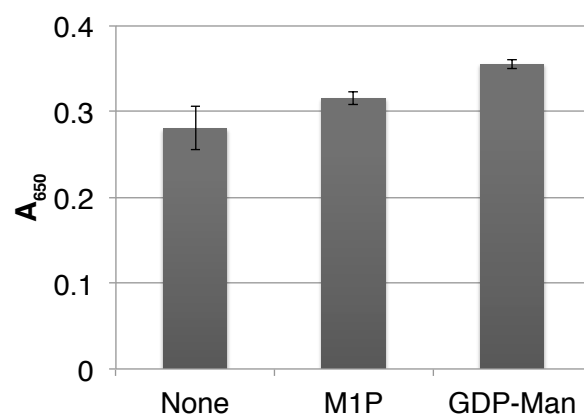

Supplement: 10.1074_M117.804377_jbc.M117.804377-1.pdf [file 10.1074_M117.804377_jbc.M117.804377-1.pdf]
